# Supplementary material for: Nanocrystalline Ce1−xSmxO2−δ (x = 0.4) solid solutions: structural characterization versus CO oxidation
Source: Royal Society of Chemistry journal article supplement (doi:10.1039/c3ra23491f), 2013-01-01
Supplement: c3ra23491f.pdf [file c3ra23491f.pdf]

## Electronic Supplementary Information

### Nanocrystalline $\text{Ce}_{1-x}\text{Sm}_x\text{O}_{2-\delta}$ ( $x = 0.4$ ) solid solutions: structural characterization versus CO oxidation

Kuncham Kuntaiah,<sup>a</sup> Putla Sudarsanam,<sup>a</sup> Benjaram M. Reddy\*<sup>a</sup> and Ajayan Vinu<sup>b</sup>

<sup>a</sup>Inorganic and Physical Chemistry Division, CSIR – Indian Institute of Chemical Technology, Uppal Road, Hyderabad – 500 607, India

<sup>b</sup>Australian Institute for Bioengineering and Nanotechnology (AIBN), Corner College and Cooper Rds (Bldg 75), the University of Queensland, Brisbane Qld 4072, Australia

\*Author to whom correspondence should be addressed. Phone: +91 40 2719 1714. Fax: +91 40 2716 0921. E-mail: bmreddy@iict.res.in, mreddyb@yahoo.com

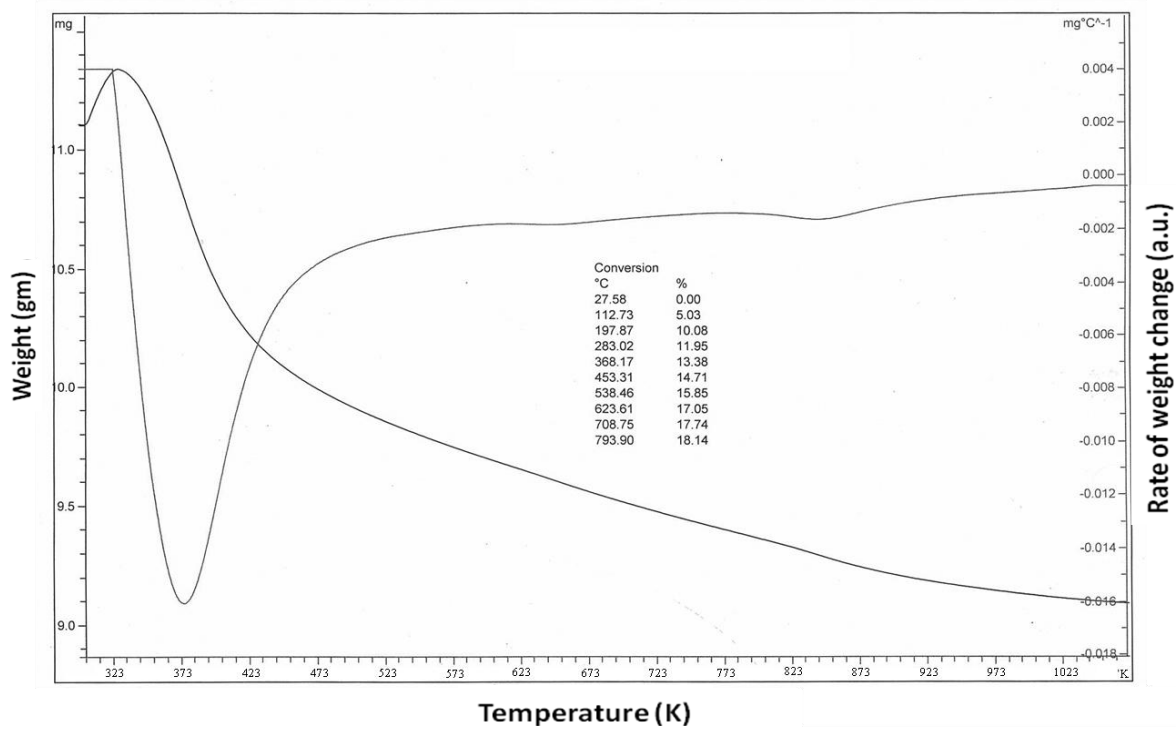

**Fig. S1** TG-DTA study of oven dried CeO<sub>2</sub>-Sm<sub>2</sub>O<sub>3</sub> sample.

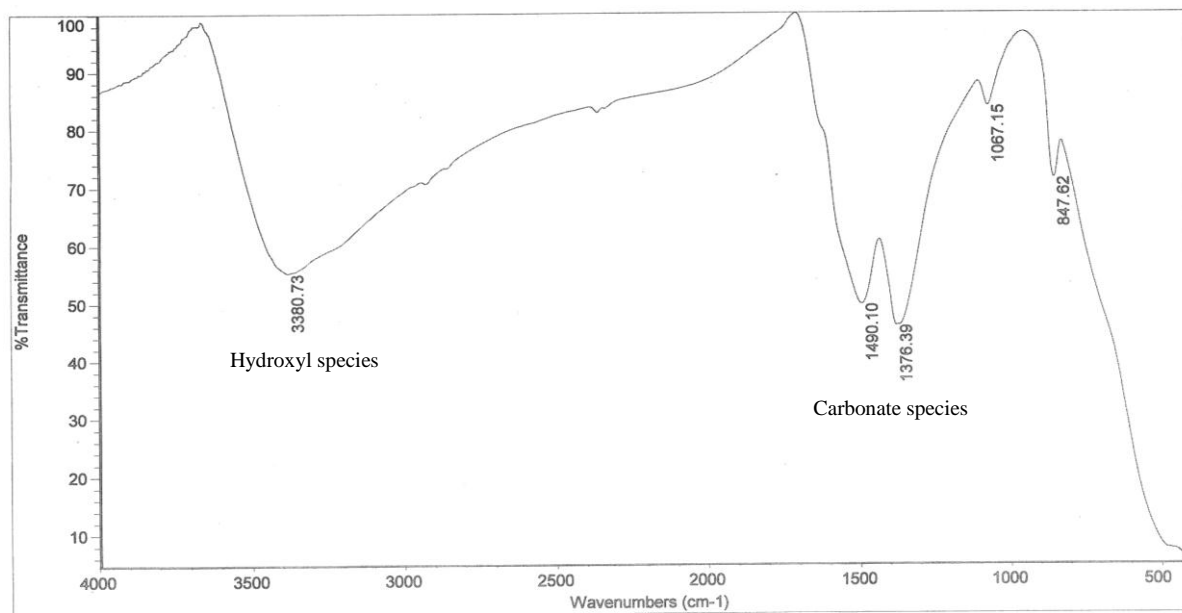

**Fig. S2** FTIR analysis of  $\text{CeO}_2\text{-Sm}_2\text{O}_3$  sample calcined at 773 K.

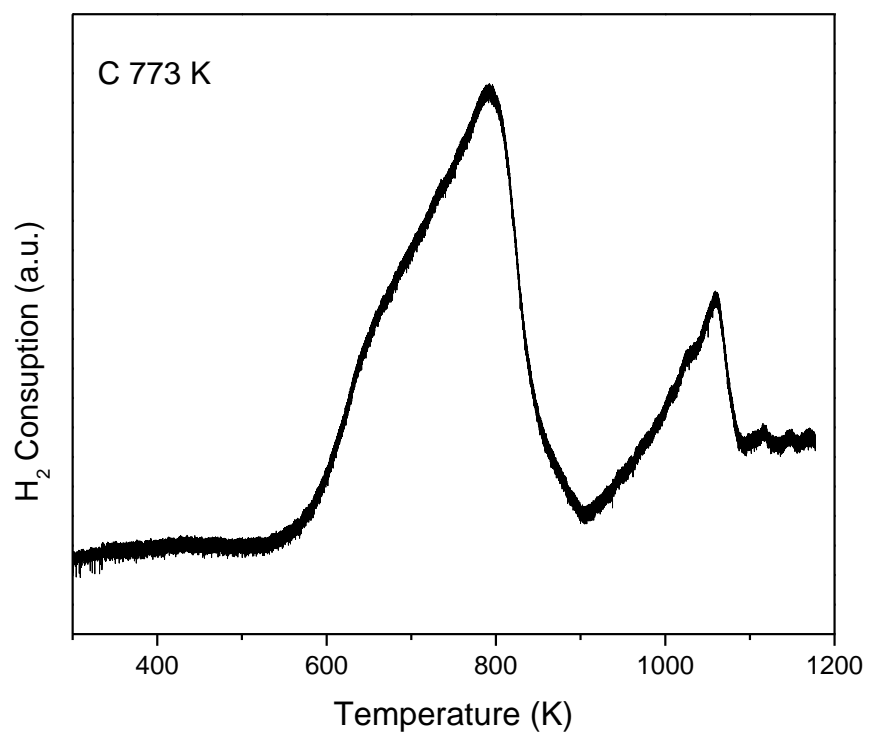

**Fig. S3** H<sub>2</sub> consumption as a function of temperature for pure CeO<sub>2</sub> sample calcined at 773 K.
